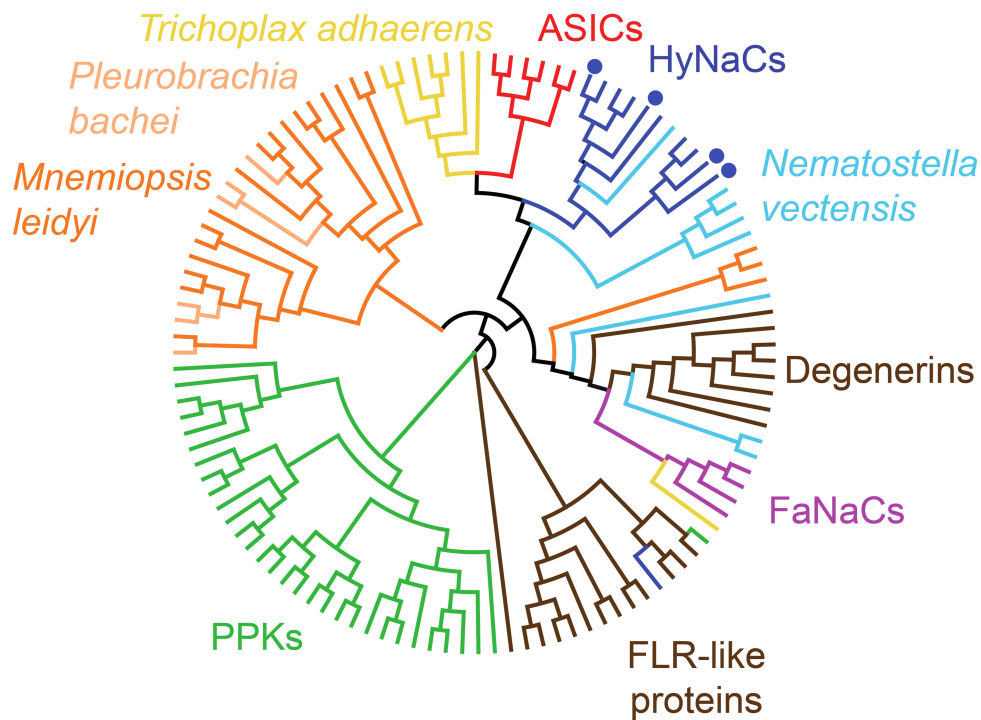

**Fig. S1 Phylogenetic relation between DEG/ENaCs as revealed by maximum likelihood analysis.** Sequences and color code are as in Fig. 10 of the main text. Maximum likelihood analysis confirms the basic relationship of DEG/ENaCs as revealed by Bayesian analysis. Conflicts and thus uncertain relations exist for three DEG/ENaCs from *Mnemiopsis*, one from *Nematostella*, one from *Hydra* and one from *Drosophila*.
